# Supplementary material
Source: publisher figshare collection journal article supplement (https://gsajournals.figshare.com/ndownloader/files/15090293)
Supplement: Supplementary file 1 [file 15090293]

## Sheet: Fe (Iron Free)
File S15. Top twenty up and downregulated genes under iron starvation and standard conditions in ve-1 mutant
Top 20 Upregulated Genes WT vs VE1 Fe Free
Gene ID	Log2Fold Change	Biological Process	Cellular Component	Molecular Function	Pfam domain(s)
NCU10101	8.57787	-	-	-	Methyltransferase domain (PF13649)
NCU04537	7.33808	transmembrane transport (GO:0055085)	integral component of membrane (GO:0016021)	transmembrane transporter activity (GO:0022857)	Sugar (and other) transporter (PF00083)
NCU10761	5.33238	-	-	-	Methyltransferase domain (PF13489)
NCU03016	4.99055	-	-	-	-
NCU00292	4.66914	-	-	-	Carboxylesterase family (PF00135)
NCU00943	4.61719	trehalose metabolic process (GO:0005991)	-	alpha,alpha-trehalase activity (GO:0004555)	Trehalase (PF01204)
NCU08648	4.59548	DNA catabolic process (GO:0006308)	-	endonuclease activity (GO:0004519); nucleic acid binding (GO:0003676)	S1/P1 Nuclease (PF02265)
NCU09685	4.13339	-	-	-	Domain of unknown function (DUF1772) (PF08592)
NCU01808	4.04794	-	-	heme binding (GO:0020037); electron transfer activity (GO:0009055)	Cytochrome c (PF00034)
NCU05627	4.01749	transmembrane transport (GO:0055085)	integral component of membrane (GO:0016021)	transmembrane transporter activity (GO:0022857)	Sugar (and other) transporter (PF00083)
NCU09873	3.99415	gluconeogenesis (GO:0006094)	-	phosphoenolpyruvate carboxykinase (ATP) activity (GO:0004612); ATP binding (GO:0005524)	Phosphoenolpyruvate carboxykinase (PF01293)
NCU03297	3.96744	response to oxidative stress (GO:0006979); oxidation-reduction process (GO:0055114)	-	heme binding (GO:0020037); peroxidase activity (GO:0004601)	Peroxidase (PF00141)
NCU05932	3.71299	-	-	-	-
NCU06060	3.69837	-	-	-	-
NCU08457	3.65077	-	-	-	-
NCU10007	3.63831	glyoxylate cycle (GO:0006097)	-	malate synthase activity (GO:0004474)	Malate synthase (PF01274)
NCU03643	3.61854	transcription, DNA-templated (GO:0006351); regulation of transcription, DNA-templated (GO:0006355)	nucleus (GO:0005634)	zinc ion binding (GO:0008270); DNA binding (GO:0003677); RNA polymerase II transcription factor activity, sequence-specific DNA binding (GO:0000981)	Fungal Zn(2)-Cys(6) binuclear cluster domain (PF00172); Fungal specific transcription factor domain (PF04082)
NCU09597	3.58206	-	-	-	-
NCU01032	3.56686	-	-	-	-
NCU05626	3.55489	-	-	-	-
Top 20 Downregulated Genes WT vs VE1 Fe Free
Gene ID	Log2Fold Change	Biological Process	Cellular Component	Molecular Function	Pfam domain(s)
NCU05126	-9.91377	-	integral component of membrane (GO:0016021)	transferase activity, transferring alkyl or aryl (other than methyl) groups (GO:0016765)	UbiA prenyltransferase family (PF01040)
NCU00732	-9.70951	oxidation-reduction process (GO:0055114)	-	heme binding (GO:0020037); iron ion binding (GO:0005506); oxidoreductase activity, acting on paired donors, with incorporation or reduction of molecular oxygen (GO:0016705)	Cytochrome P450 (PF00067)
NCU10865	-8.69542	metabolic process (GO:0008152)	-	oxidoreductase activity (GO:0016491)	Common central domain of tyrosinase (PF00264)
NCU04205	-8.25615	proteolysis (GO:0006508)	-	aspartic-type endopeptidase activity (GO:0004190)	Peptidase A4 family (PF01828)
NCU07033	-8.16053	-	-	-	LysM domain (PF01476)
NCU04931	-8.06662	-	-	-	-
NCU07034	-7.79331	-	-	-	LysM domain (PF01476)
NCU08223	-7.71656	-	-	-	-
NCU02919	-7.52288	-	-	-	Cupin domain (PF07883)
NCU02369	-7.32129	carbohydrate metabolic process (GO:0005975)	-	polygalacturonase activity (GO:0004650)	Glycosyl hydrolases family 28 (PF00295)
NCU04928	-7.26103	mycotoxin biosynthetic process (GO:0043386)	-	-	Domain of unknown function (DUF3328) (PF11807)
NCU03121	-7.06125	-	-	ATP binding (GO:0005524)	ATPase family associated with various cellular activities (AAA) (PF00004)
NCU09356	-6.6406	-	-	-	-
NCU09904	-6.63171	carbohydrate metabolic process (GO:0005975)	-	hydrolase activity, hydrolyzing O-glycosyl compounds (GO:0004553)	Glycosyl hydrolases family 16 (PF00722)
NCU11291	-6.60187	-	-	-	Domain of unknown function (DUF1993) (PF09351)
NCU16445	-6.57578	-	-	-	-
NCU05567	-6.54553	-	-	-	-
NCU09428	-6.52541	-	-	-	-
NCU08643	-6.47597	-	-	metal ion binding (GO:0046872); hydrolase activity (GO:0016787); acid phosphatase activity (GO:0003993)	Iron/zinc purple acid phosphatase-like protein C (PF14008); Calcineurin-like phosphoesterase (PF00149); Purple acid Phosphatase, N-terminal domain (PF16656)
NCU10539	-6.41406	-	-	-	-

## Sheet: Standard media
Top 20 Upregulated Genes WT vs VE1 Standard
Gene ID	Log2Fold Change	Biological Process	Cellular Component	Molecular Function	Pfam domain(s)
NCU10016	10.0569	oxidation-reduction process (GO:0055114)	-	flavin adenine dinucleotide binding (GO:0050660); oxidoreductase activity, acting on the CH-CH group of donors (GO:0016627)	Acyl-CoA dehydrogenase, C-terminal domain (PF08028); Acyl-CoA dehydrogenase, N-terminal domain (PF02771)
NCU07819	9.6539	oxidation-reduction process (GO:0055114)	-	oxidoreductase activity (GO:0016491)	Taurine catabolism dioxygenase TauD, TfdA family (PF02668)
NCU05883	9.12836	oxidation-reduction process (GO:0055114)	-	oxidoreductase activity, acting on paired donors, with incorporation or reduction of molecular oxygen (GO:0016705)	Luciferase-like monooxygenase (PF00296)
NCU05888	9.01604	oxidation-reduction process (GO:0055114)	-	oxidoreductase activity, acting on paired donors, with incorporation or reduction of molecular oxygen (GO:0016705)	Luciferase-like monooxygenase (PF00296)
NCU07610	8.90467	oxidation-reduction process (GO:0055114)	-	oxidoreductase activity (GO:0016491)	Taurine catabolism dioxygenase TauD, TfdA family (PF02668)
NCU07820	8.60851	transmembrane transport (GO:0055085)	integral component of membrane (GO:0016021)	-	Major Facilitator Superfamily (PF07690)
NCU05887	8.26652	-	-	-	-
NCU01095	7.97221	transmembrane transport (GO:0055085)	integral component of membrane (GO:0016021)	-	Major Facilitator Superfamily (PF07690)
NCU09678	7.58624	transmembrane transport (GO:0055085)	integral component of membrane (GO:0016021)	-	Major Facilitator Superfamily (PF07690)
NCU05884	7.48865	transmembrane transport (GO:0055085)	integral component of membrane (GO:0016021)	-	Major Facilitator Superfamily (PF07690)
NCU02196	7.24387	oxidation-reduction process (GO:0055114)	-	oxidoreductase activity (GO:0016491)	Taurine catabolism dioxygenase TauD, TfdA family (PF02668)
NCU05886	6.88843	-	-	-	-
NCU07609	6.83618	transmembrane transport (GO:0055085)	integral component of membrane (GO:0016021)	-	Major Facilitator Superfamily (PF07690)
NCU10101	6.67162	-	-	-	Methyltransferase domain (PF13649)
NCU02195	6.65759	amino acid transmembrane transport (GO:0003333)	membrane (GO:0016020)	amino acid transmembrane transporter activity (GO:0015171)	Amino acid permease (PF13520)
NCU01057	6.6404	oxidation-reduction process (GO:0055114)	-	oxidoreductase activity (GO:0016491)	Taurine catabolism dioxygenase TauD, TfdA family (PF02668)
NCU05763	5.84156	-	-	-	-
NCU08364	5.63247	metabolic process (GO:0008152)	-	sulfuric ester hydrolase activity (GO:0008484)	Choline sulfatase enzyme C terminal (PF12411); Sulfatase (PF00884)
NCU05761	5.54169	mycotoxin biosynthetic process (GO:0043386)	-	-	Domain of unknown function (DUF3328) (PF11807)
NCU04942	5.08475	amino acid transmembrane transport (GO:0003333)	membrane (GO:0016020)	amino acid transmembrane transporter activity (GO:0015171)	Amino acid permease (PF13520)
Top 20 Downregulated Genes WT vs VE1 Standard
Gene ID	Log2Fold Change	Biological Process	Cellular Component	Molecular Function	Pfam domain(s)
NCU05126	-9.78995	-	integral component of membrane (GO:0016021)	transferase activity, transferring alkyl or aryl (other than methyl) groups (GO:0016765)	UbiA prenyltransferase family (PF01040)
NCU05567	-9.63672	-	-	-	-
NCU09775	-7.35088	arabinan metabolic process (GO:0031221)	-	alpha-L-arabinofuranosidase activity (GO:0046556)	Alpha-L-arabinofuranosidase B, catalytic (PF09206)
NCU06912	-7.30519	-	-	-	-
NCU00175	-7.20097	-	-	-	-
NCU05964	-7.0906	-	-	-	Velvet factor (PF11754)
NCU06327	-6.97037	oxidation-reduction process (GO:0055114)	-	heme binding (GO:0020037); iron ion binding (GO:0005506); oxidoreductase activity, acting on paired donors, with incorporation or reduction of molecular oxygen (GO:0016705)	Cytochrome P450 (PF00067)
NCU09702	-6.84521	-	-	-	O-Glycosyl hydrolase family 30 (PF14587)
NCU01092	-6.83035	-	-	-	Enoyl-(Acyl carrier protein) reductase (PF13561)
NCU04482	-6.73454	-	-	-	Pathogen effector; putative necrosis-inducing factor (PF14856)
NCU09650	-6.56094	-	-	-	-
NCU07736	-6.53984	transport (GO:0006810)	-	-	Fungal trichothecene efflux pump (TRI12) (PF06609)
NCU05189	-6.38974	-	-	-	-
NCU07033	-6.3547	-	-	-	LysM domain (PF01476)
NCU09856	-6.27324	-	-	ATP binding (GO:0005524)	ATPase family associated with various cellular activities (AAA) (PF00004)
NCU09904	-6.14522	carbohydrate metabolic process (GO:0005975)	-	hydrolase activity, hydrolyzing O-glycosyl compounds (GO:0004553)	Glycosyl hydrolases family 16 (PF00722)
NCU06328	-6.03481	-	-	-	-
NCU11405	-5.92321	-	-	hydrolase activity (GO:0016787)	Glycosyl hydrolase family 71 (PF03659)
NCU06413	-5.9192	-	-	-	-
NCU09506	-5.75187	-	-	-	-

## Sheet: Sheet2
Top 20 Upregulated Genes WT vs VE1 Standard
Gene ID	Log2Fold Change	Biological Process	Cellular Component	Molecular Function	Pfam domain(s)
NCU10016	10.0569	oxidation-reduction process (GO:0055114)	-	flavin adenine dinucleotide binding (GO:0050660); oxidoreductase activity, acting on the CH-CH group of donors (GO:0016627)	Acyl-CoA dehydrogenase, C-terminal domain (PF08028); Acyl-CoA dehydrogenase, N-terminal domain (PF02771)
NCU07819	9.6539	oxidation-reduction process (GO:0055114)	-	oxidoreductase activity (GO:0016491)	Taurine catabolism dioxygenase TauD, TfdA family (PF02668)
NCU05883	9.12836	oxidation-reduction process (GO:0055114)	-	oxidoreductase activity, acting on paired donors, with incorporation or reduction of molecular oxygen (GO:0016705)	Luciferase-like monooxygenase (PF00296)
NCU05888	9.01604	oxidation-reduction process (GO:0055114)	-	oxidoreductase activity, acting on paired donors, with incorporation or reduction of molecular oxygen (GO:0016705)	Luciferase-like monooxygenase (PF00296)
NCU07610	8.90467	oxidation-reduction process (GO:0055114)	-	oxidoreductase activity (GO:0016491)	Taurine catabolism dioxygenase TauD, TfdA family (PF02668)
NCU07820	8.60851	transmembrane transport (GO:0055085)	integral component of membrane (GO:0016021)	-	Major Facilitator Superfamily (PF07690)
NCU05887	8.26652	-	-	-	-
NCU01095	7.97221	transmembrane transport (GO:0055085)	integral component of membrane (GO:0016021)	-	Major Facilitator Superfamily (PF07690)
NCU09678	7.58624	transmembrane transport (GO:0055085)	integral component of membrane (GO:0016021)	-	Major Facilitator Superfamily (PF07690)
NCU05884	7.48865	transmembrane transport (GO:0055085)	integral component of membrane (GO:0016021)	-	Major Facilitator Superfamily (PF07690)
NCU02196	7.24387	oxidation-reduction process (GO:0055114)	-	oxidoreductase activity (GO:0016491)	Taurine catabolism dioxygenase TauD, TfdA family (PF02668)
NCU05886	6.88843	-	-	-	-
NCU07609	6.83618	transmembrane transport (GO:0055085)	integral component of membrane (GO:0016021)	-	Major Facilitator Superfamily (PF07690)
NCU10101	6.67162	-	-	-	Methyltransferase domain (PF13649)
NCU02195	6.65759	amino acid transmembrane transport (GO:0003333)	membrane (GO:0016020)	amino acid transmembrane transporter activity (GO:0015171)	Amino acid permease (PF13520)
NCU01057	6.6404	oxidation-reduction process (GO:0055114)	-	oxidoreductase activity (GO:0016491)	Taurine catabolism dioxygenase TauD, TfdA family (PF02668)
NCU05763	5.84156	-	-	-	-
NCU08364	5.63247	metabolic process (GO:0008152)	-	sulfuric ester hydrolase activity (GO:0008484)	Choline sulfatase enzyme C terminal (PF12411); Sulfatase (PF00884)
NCU05761	5.54169	mycotoxin biosynthetic process (GO:0043386)	-	-	Domain of unknown function (DUF3328) (PF11807)
NCU04942	5.08475	amino acid transmembrane transport (GO:0003333)	membrane (GO:0016020)	amino acid transmembrane transporter activity (GO:0015171)	Amino acid permease (PF13520)
Top 20 Downregulated Genes WT vs VE1 Standard
Gene ID	Log2Fold Change	Biological Process	Cellular Component	Molecular Function	Pfam domain(s)
NCU05126	-9.78995	-	integral component of membrane (GO:0016021)	transferase activity, transferring alkyl or aryl (other than methyl) groups (GO:0016765)	UbiA prenyltransferase family (PF01040)
NCU05567	-9.63672	-	-	-	-
NCU09775	-7.35088	arabinan metabolic process (GO:0031221)	-	alpha-L-arabinofuranosidase activity (GO:0046556)	Alpha-L-arabinofuranosidase B, catalytic (PF09206)
NCU06912	-7.30519	-	-	-	-
NCU00175	-7.20097	-	-	-	-
NCU05964	-7.0906	-	-	-	Velvet factor (PF11754)
NCU06327	-6.97037	oxidation-reduction process (GO:0055114)	-	heme binding (GO:0020037); iron ion binding (GO:0005506); oxidoreductase activity, acting on paired donors, with incorporation or reduction of molecular oxygen (GO:0016705)	Cytochrome P450 (PF00067)
NCU09702	-6.84521	-	-	-	O-Glycosyl hydrolase family 30 (PF14587)
NCU01092	-6.83035	-	-	-	Enoyl-(Acyl carrier protein) reductase (PF13561)
NCU04482	-6.73454	-	-	-	Pathogen effector; putative necrosis-inducing factor (PF14856)
NCU09650	-6.56094	-	-	-	-
NCU07736	-6.53984	transport (GO:0006810)	-	-	Fungal trichothecene efflux pump (TRI12) (PF06609)
NCU05189	-6.38974	-	-	-	-
NCU07033	-6.3547	-	-	-	LysM domain (PF01476)
NCU09856	-6.27324	-	-	ATP binding (GO:0005524)	ATPase family associated with various cellular activities (AAA) (PF00004)
NCU09904	-6.14522	carbohydrate metabolic process (GO:0005975)	-	hydrolase activity, hydrolyzing O-glycosyl compounds (GO:0004553)	Glycosyl hydrolases family 16 (PF00722)
NCU06328	-6.03481	-	-	-	-
NCU11405	-5.92321	-	-	hydrolase activity (GO:0016787)	Glycosyl hydrolase family 71 (PF03659)
NCU06413	-5.9192	-	-	-	-
NCU09506	-5.75187	-	-	-	-
